# Supplementary material
Source: PubMed Central journal article supplement (PMC3743530)
Supplement: NIHMS503949-supplement-Supplementary_Data.pdf [file NIHMS503949-supplement-Supplementary_Data.pdf]

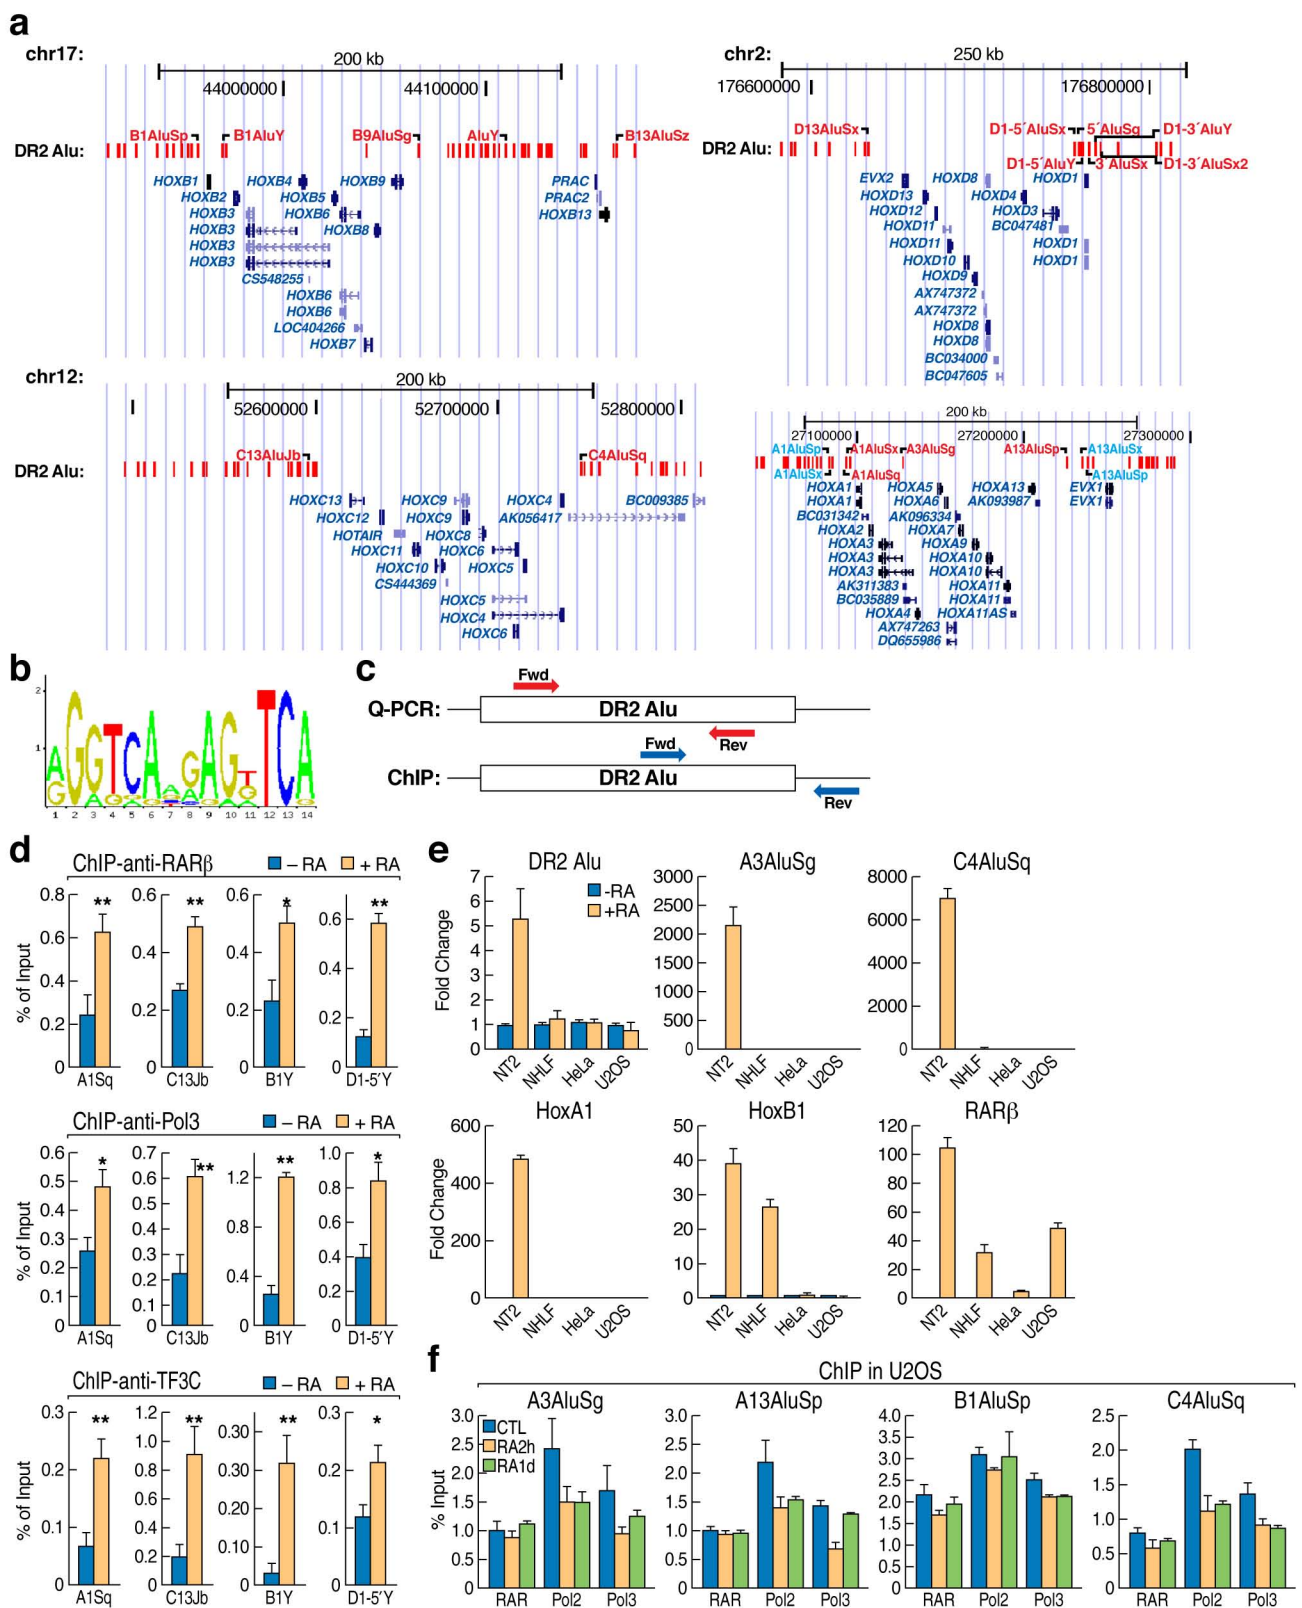

Supplementary Figure 1. DR2 Alu is activated by RA. (a) Distribution of all potential DR2 Alu elements flanking *HoxA-D*. Repeats highlighted in red are activated potentially by RA while those in aqua not. (b) The sequence logo of the DR2 position frequency matrix from PAZAR database. (c) The design of DR2 Alu primers used in this study. (d) RA-induced recruitment of RAR $\beta$ , Pol III and TF3C onto the DR2 Alu repeats flanking *Hox*. (e) RT-qPCR showing the RA-induced DR2 Alu and coding gene transcription in indicated cells. (f) Recruitment of RAR $\beta$ , Pol II and Pol III on DR2 Alu repeats was not enhanced in RA-treated U2OS cells. (mean+SEM; \* $p$ <0.05, \*\* $p$ <0.01)

Distribution of distances between  
extragenic (intergenic) RA-induced DR2 ALU and  
the TSS of expressed genes after RA treatment

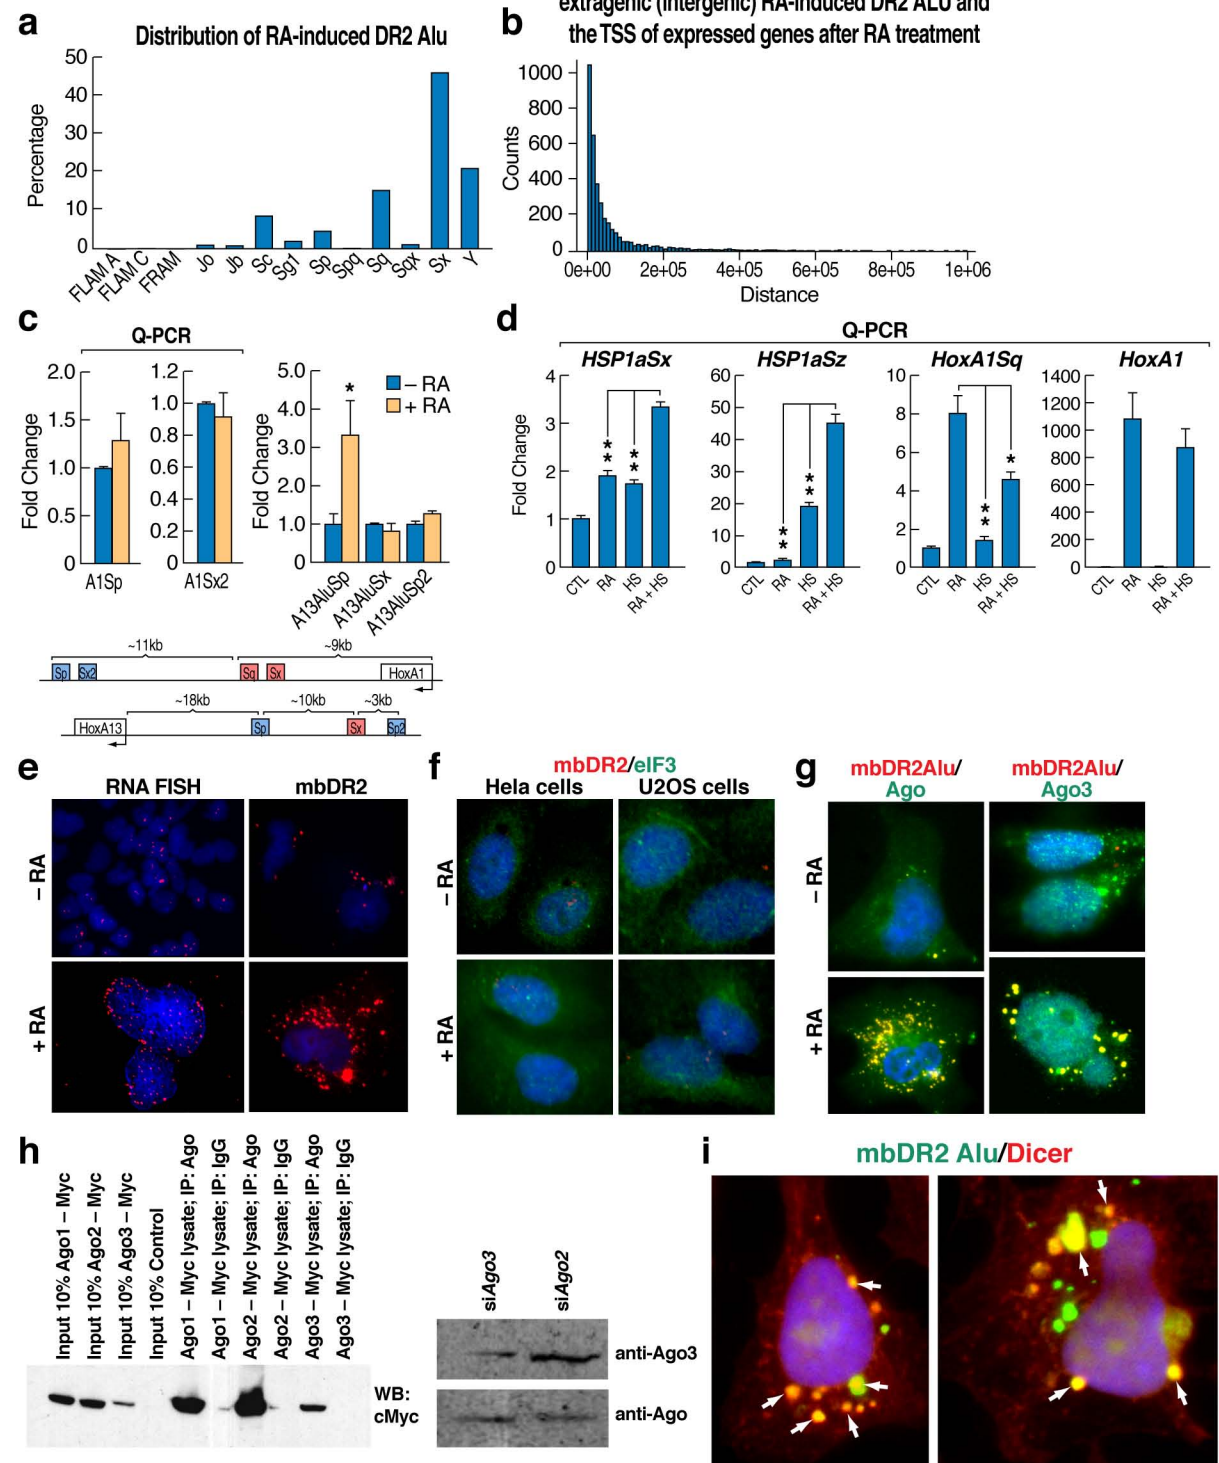

Supplementary Figure 2. DR2 Alu transcripts are localized in the cytoplasm. (a) The distribution of DR2 Alu transcripts among the Alu subfamilies. (b) The distribution of the distance between induced intergenic DR2 Alu and gene TSS. (c) DR2 Alu elements located further from *HoxA1* or *HoxA13* (>20kb) were not activated by RA. (d) Two DR2 Alu repeats near *Hsp70* showed a combinatorial response to heat shock plus RA treatment, while the repeat near *HoxA1* and *HoxA1* itself did not. (mean+SEM; \*p<0.05; \*\*p<0.01) (e) RNA FISH and molecular beacon (mbDR2) showed an increase of DR2 Alu transcripts in RA-treated cells. (f) In HeLa and U2OS cells, RA did not increase DR2 Alu RNAs determined by molecular beacons. (g) Immunostaining plus mbDR2 showed that DR2 Alu transcripts were colocalized with AGO proteins, including AGO3. (h) Validation of the AGO antibodies. Left: Myc-tagged AGO1-3 overexpressed in 293T were immunoprecipitated with the Ago antibody and immunoblotted with anti-Myc; right: Ntera2 transfected with AGO2 or 3 siRNAs were immunoblotted with the AGO3 or the generic AGO antibody. (i) Molecular beacon and immunostaining showed the partial colocalization of DR2 Alu transcripts with DICER (arrows) in the cytoplasm.

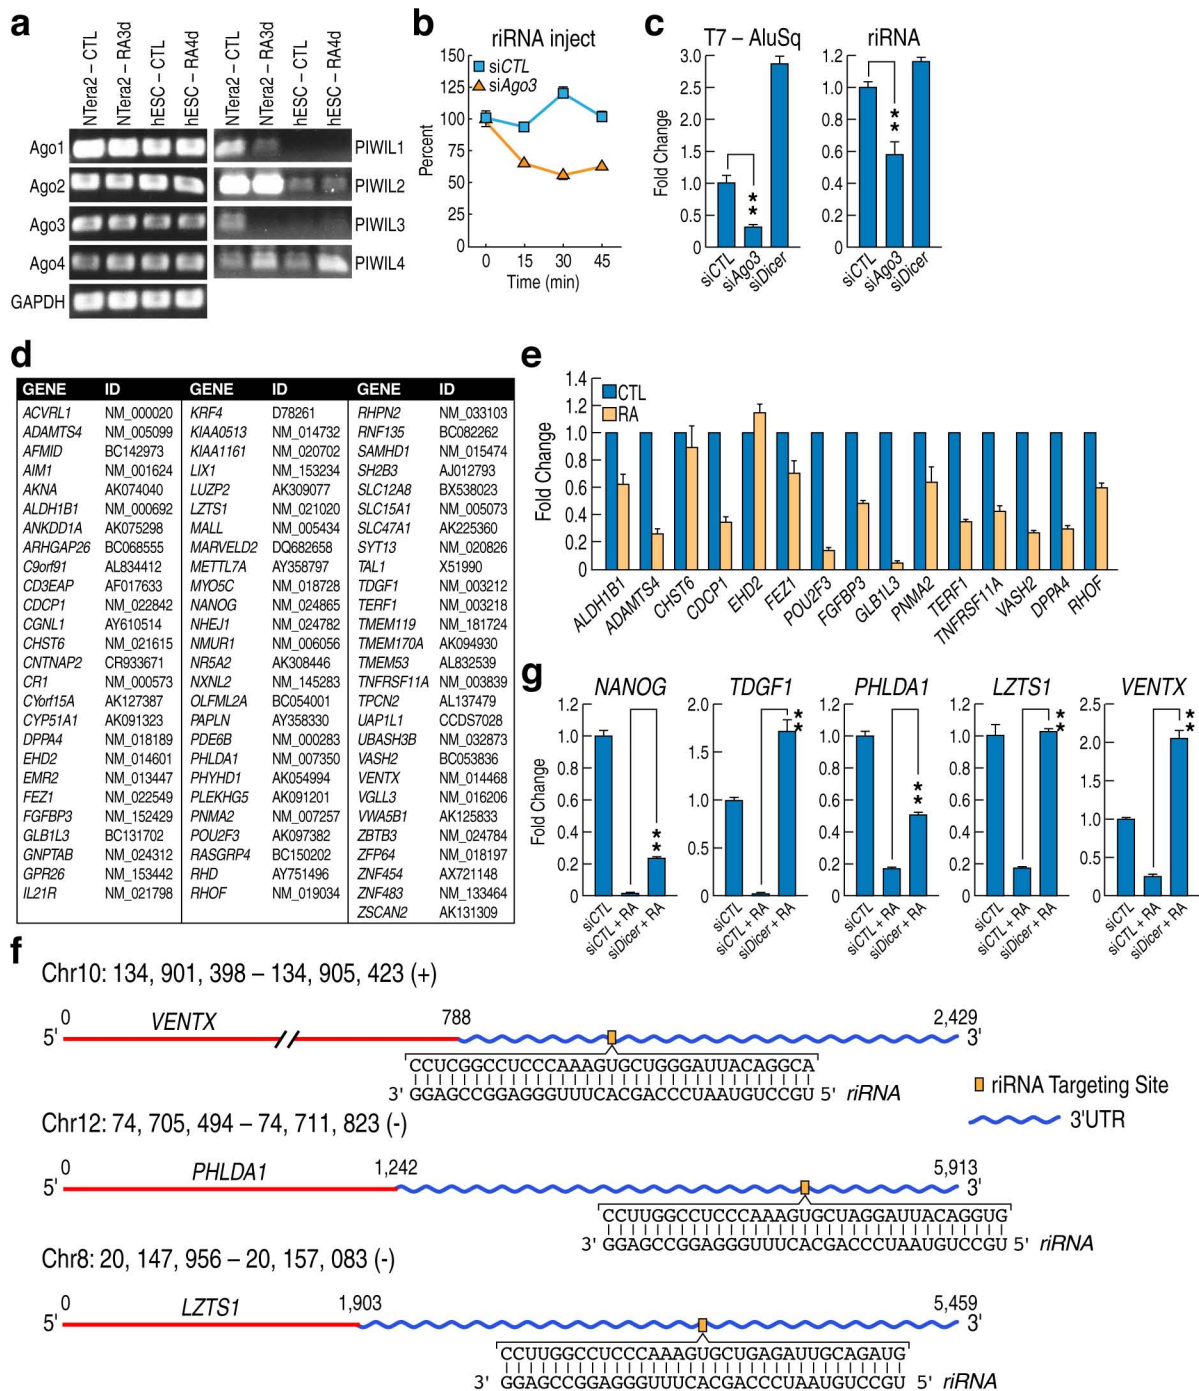

Supplementary Figure 3. AGO3 stabilizes riRNAs targeting 3'UTRs of mRNAs. (a) RT-PCR showed the expression of AGO and PIWIL homologs in Ntera2 and hESCs. (b) Ntera2 with AGO3 knockdown were microinjected with a synthesized 69nt. riRNA oligonucleotide. The cells were harvested at indicated time points and analyzed by RT-qPCR. (c) Ntera2 with AGO3 or DICER knockdown were transfected with DR2 Alu transcripts or riRNA for four hours. The introduced RNAs were analyzed by RT-qPCR analysis. (d) List of 79 RA-downregulated transcripts (FC down-reg>1.5, and q-val<0.05) containing complementary sequences to riRNA in the 3'UTRs. (e) RT-qPCR confirmed that 13 out of 15 genes from the list (d) were downregulated by RA. (f) Structures of representative transcripts from the list (d). (g) RT-qPCR showed that knockdown of DICER reversed RA-induced expression downregulation. (mean+SEM; \* $p$ <0.05, \*\* $p$ <0.01)

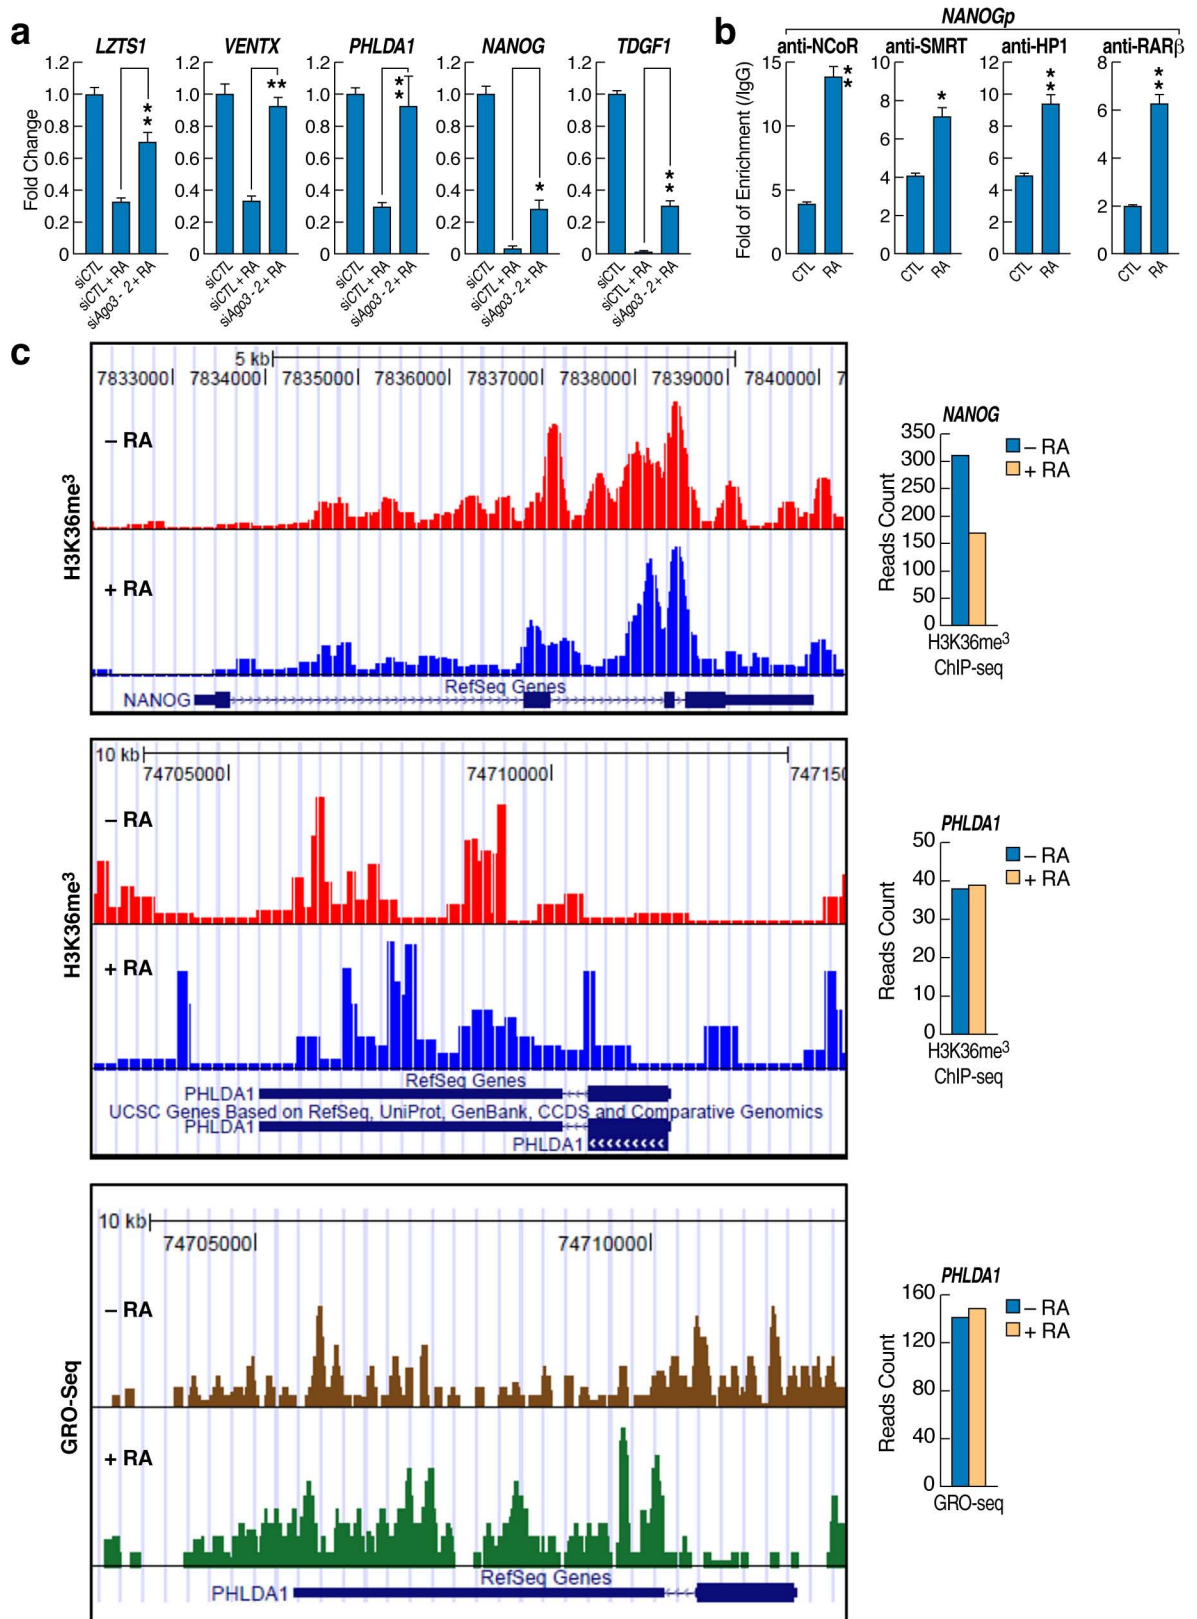

Supplementary Figure 4. Nanog is also regulated at the transcriptional level. (a) AGO3 knockdown by another siRNA (Dharmacon) abolished RA-induced expression downregulation. (b) ChIP assays showed RA-induced recruitment of NCoR-SMRT, HP1 and RAR $\beta$  at the *Nanog* promoter. (mean+SEM; \* $p$ <0.05, \*\* $p$ <0.01) (c) UCSC genome browser displays of the H3K36me3 ChIP-seq and GRO-seq reads over *Nanog* and *Phlda1* (H3K36me3 ChIP-seq: (-)RA in red, (+)RA in blue; GRO-seq: (-)RA in brown, and (+)RA in green).

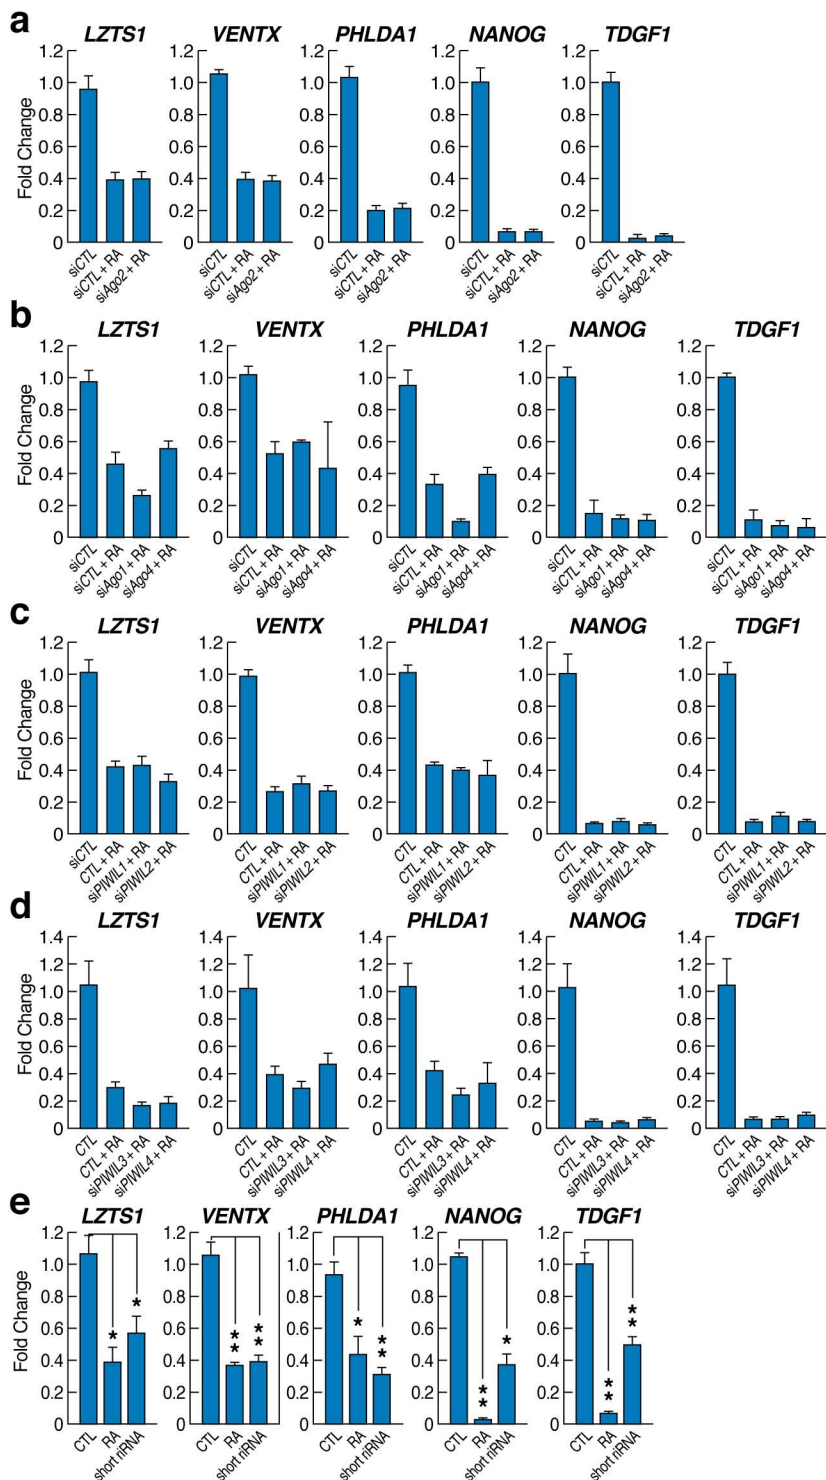

Supplementary Figure 5. Other argonaute and piwi-like proteins did not restore transcript levels. (a-d) Knock-down of AGO1,2,4 and PIWIL1-4 did not abolish RA-mediated downregulation of the indicated genes. (e) Transfection of a synthesized 26nt. rRNA oligonucleotide decreased the transcript levels of the indicated genes in Ntera2. (mean+SEM; \* $p < 0.05$ , \*\* $p < 0.01$ )

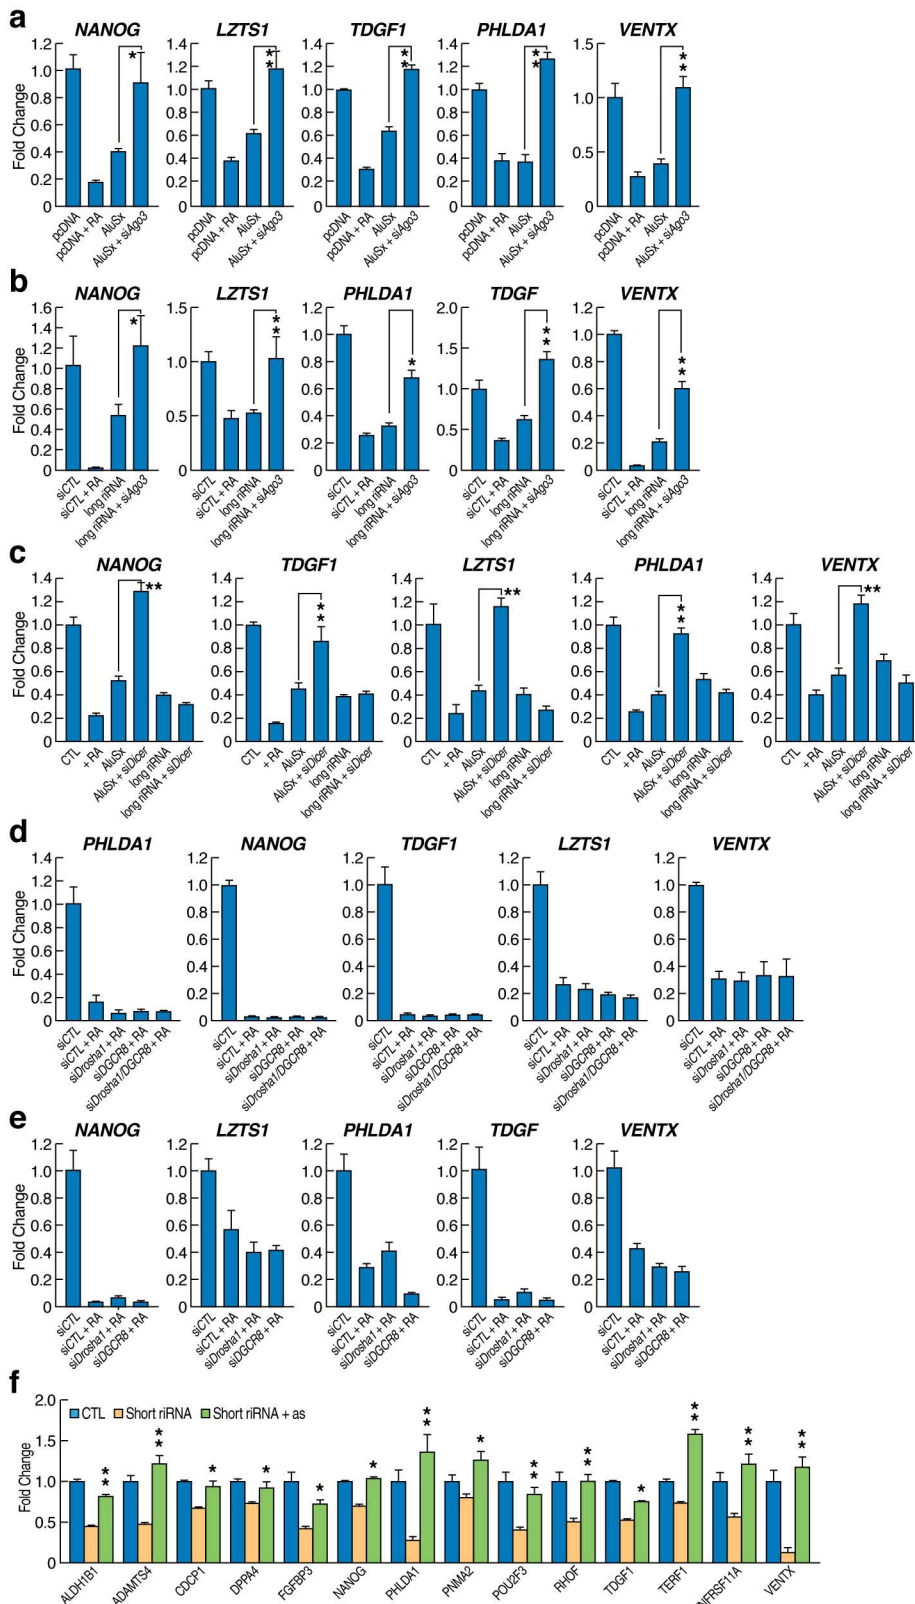

Supplementary Figure 6. AGO3 and DICER are involved in siRNA-mediated downregulation of transcripts. (a,b) AGO3 knockdown neutralized the repressive effects of overexpressed AluSx or siRNAs on genes. (c) DICER knockdown did not affect siRNA-mediated transcript down-regulation. (d,e) DROSHA1 or DGCR8 knockdown by two sets of different siRNAs did not release RA-mediated repression of these genes. (f) Ntera2 were co-transfected with the same molar amount of short siRNA and the antisense oligonucleotide. RT-qPCR showed the neutralizing effects of the antisense oligonucleotide. (mean+SEM; \* $p < 0.05$ , \*\* $p < 0.01$ )

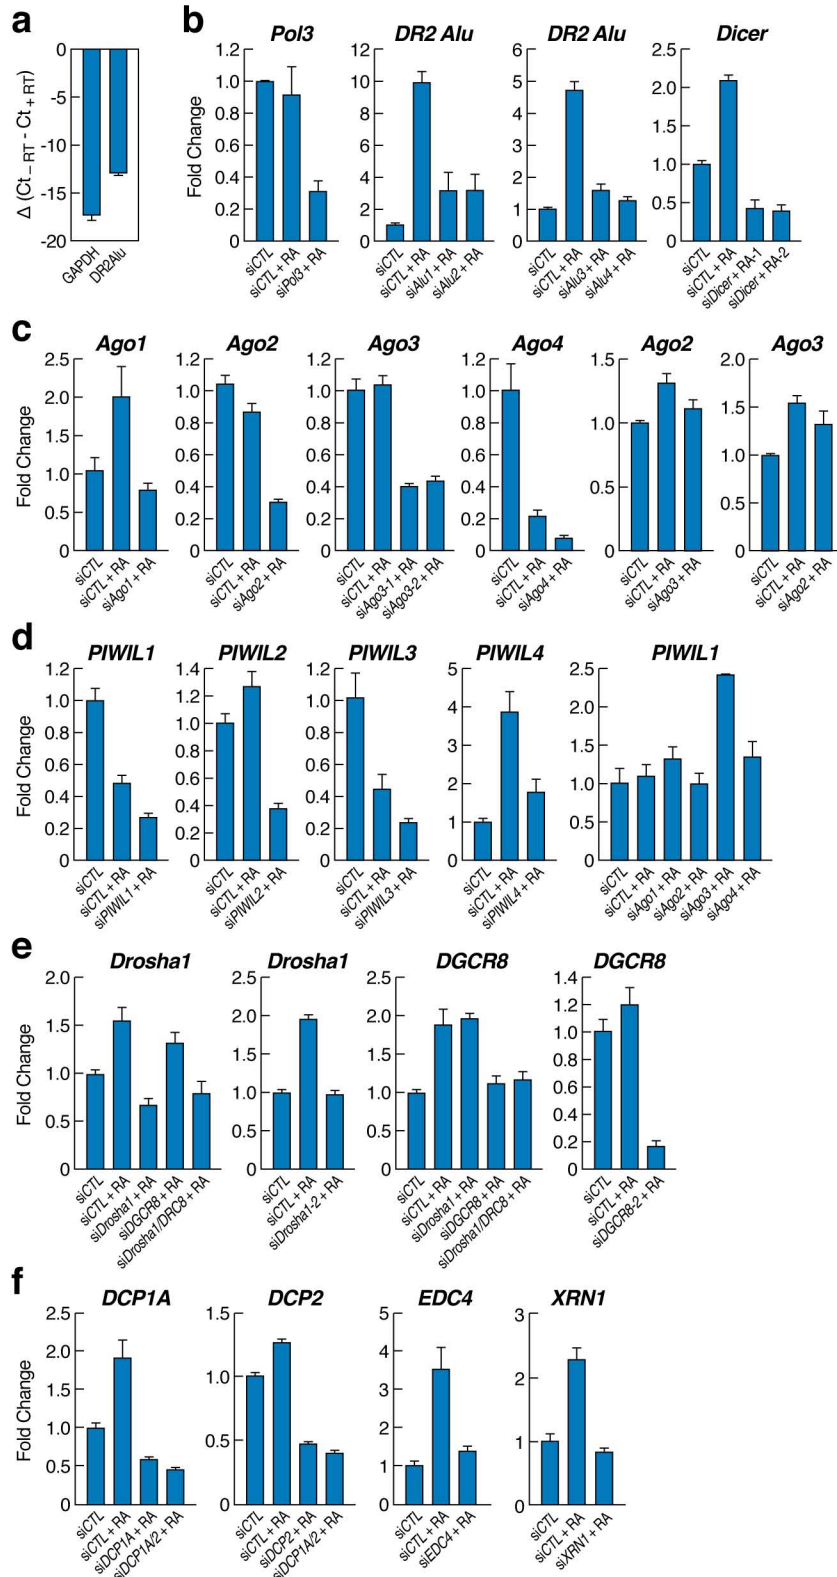

Supplementary Figure 7. Validation of the siRNAs. (a) In RA-treated cells, minus RT control gave insignificant amplification signals for Gapdh and DR2 Alu, as exemplified by the huge negative  $\Delta(Ct_{\text{minusRT}} - Ct_{\text{plusRT}})$  in RT-qPCR. (b-f) RT-qPCR assays verified the efficiency of the siRNAs used.

**Table 1. Customized molecular beacons, oligonucleotides and siRNAs**

| Name         | Sequences                                                                                                              |
|--------------|------------------------------------------------------------------------------------------------------------------------|
| mbDR2 Alu    | /56-FAM/CGACGmUCGAAcUmUGCTmGACCmUCATGAmUCCGTCG/3IABkFQ/                                                                |
| riRNA-short  | /5Biosg/mUmGmUmAmAmUmCmCmCmAmGmCmAmCmUmUmUmGmGmGmAmGmGmCmCmG                                                           |
| riRNA-long   | /5Biosg/mGmUmGmGmCmUmCmAmUmGmCmCmUmGmUmAmAmUmCmCmCmAmGmCmAmCmUmUmUmGmGmGmAmGmCmCmGmAmGmGmUmGmGmGmUmGmGmAmUmCmAmUmGmAmG |
| riRNA-inject | GUGGCUCAUGCCUGUAAUCCAGCACUUUGGGAGGCCGAGGUGGGUGGAUCAUGAGGUCAGCAGUUCG                                                    |
| siAlu1       | 5'-gguggcaggugcauguaauuu-3'                                                                                            |
| siAlu2       | 5'-cugggaacaagagcauuuu-3'                                                                                              |
| siAlu3       | 5'-gucaggagaucgagaccauuu-3'                                                                                            |
| siAlu4       | 5'-gggugaggugagguggaucuuu-3'                                                                                           |

“m” indicates 2’O-methyl modification.

**Table 2. Primers used in RT-qPCR**

| Name           | Sequences                                                             | Name      | Sequences                                         |
|----------------|-----------------------------------------------------------------------|-----------|---------------------------------------------------|
| GAPDH          | aacatcatccctgcctctactgg+gttttctagacggcaggctcagg                       | PIWIL3    | atatctctctcctcagtggttg+tcactctccgctcttttagtg      |
| HoxA1          | acttcatactacagcagctcacg+cgaagagctggacttctctgagg                       | PIWIL4    | ctctgctttctaacagggtctgac+tcaccaggtctctagtctcaaacg |
| HoxB1          | ctgggtcaatcagaaggagacg+tcggagaggagatcagcataagg                        | ALDH1B1   | catgccgtggagcagygcca+cgcctctctctgccaagc           |
| RARb           | gaccatcgagaccaattacc+aggtcagtcagaggaccaaatc                           | CHST6     | ccaggagagaggcgtcccc+ggcactgtccagggtgctg           |
| DR2 Alu        | cctgaggctcagaagtcaagacc+gcaatggcatggtctcagctc                         | EHD2      | cccaactcagtgctggggcg+gagcccttggtgggtcgtt          |
| HoxA1-AluSq    | caaaaattagctgtactggtggcaggcgctgtaattcc+gagtgaggagttt                  | FEZ1      | ggggctctttgccgttggtc+cggtgctctccctctctct          |
| HoxA1-AluSp    | agcctgaccaacatggagaaac+catcttggctcactgcaacat                          | FGD4      | ccccaggagctcagagccca+cctccacaccatggctggtcc        |
| HoxA1-AluSx2   | gcttgggcctgtaatctcagaa+cttgctgtctgcaacctctac                          | FGFBP3    | gaaaacccctcagagaggaagac+caaagaagtgagagggagtgctc   |
| HoxB1-AluSp    | ctactaaaaatacaaaattagccggcgggatggcccatg+gagatggagtttgcctcttatggccaggc | GLB1L3    | gattccagagtgattctctcc+caccatcagaggtcaagagaagc     |
| HoxB1-AluY     | gagaccatcctgctaacaca+gacggagctcttgcctgtcac                            | PNMA2     | gctccggagagcggtgaga+agctcctaagccggcacca           |
| HoxC4-AluSq    | taaaactacaaaaaataaccaggcgtggtggcaggagac+gagacggagt                    | TERF1     | acagctcgcgtaactgaatc+aggtctgttctgggttcca          |
| HoxD1-5’AluSx  | taaaaattagctgggtgtggtg+agatggagtcctcgtttgtcac                         | TNFRSF11A | cacagctaatttggcactgg+gacagacaccacttgatctgg        |
| HoxD1-3’AluSx2 | catagtggctcatgcctgtaatc+ccttggttcaagaaattctcc                         | VASH2     | ggaaggagctggagaaatagc+gatcagccactcttttcagg        |
| LZTS1          | caagtcctccacctcaagaag+ctggacagtcgccgtgtaactg                          | ADAMTS4   | caacatgctccatgacaactcc+tetaagagacagtcgccatagcc    |
| VENTX          | gagtaaggagccaaataacttg+ccagggtttatctggacctctg                         | CDCP1     | cggtttagagctgagttttcc+ggtgtaaggccattttcactcc      |
| PHLDA1         | gcacttctccaacatgaagacc+gattctgtactgcacatctgc                          | POU2F3    | aagtttgccaagaccttcaagc+gcatacttcacacttctcc        |
| TDGF1          | tgggatacagcacagtaagga+ccagcatttacacagggaacac                          | RHOF      | atcgggtgttcgagaagtacacg+cttgatgaggacgtttctgtag    |
| NANOG          | cacttctgcagagaagagtgctg+gtagctgaggttcaggatgttgg                       | Pol III   | taggatgggtacgagtgagaag+cttcttctctctgggacag        |
| HSP1aSx        | cagcctggccaaactggtagg+gagatggagtcgctctgtcac                           | DCP1A     | ctaatacctccagcctccatcac+tcgtctaggcgtggtttcac      |
| HSP1aSz        | atcccagcatttggaggctgaggtgg+ctgcctcagcctccctggactac                    | DCP2      | ccattaagggaactgctttctc+ctgtgtttaccactgtgtcac      |
| Ago1           | acattgatgtcagccactgc+cggtaacttctcttctctgttc                           | EDC4      | cttgacctctcagcagaatacc+agcgactcacaacctggatacc     |
| Ago2           | ggcagatgaagagggaagtacc+taggtgtgtttctgtcctgtc                          | XRN1      | ctccctcaaaaagggaagagg+tctacacgccaagcatctaagg      |
| Ago3           | atttgtctctcgggtgagttgg+gagggtggtcatatccttctgg                         | Drosha 1  | tgggagattctacagtggttgg+gactcacactcgattcactgg      |
| Ago4           | ggttagcttggccagaactaatg+ctgtagtgcctgctgtacattg                        | DGCR8     | gaggagaatgagctggatcagg+tgtcaagtcacctcgttaggg      |
| PIWIL1         | cactgatggaagccagaagactc+gatcgttatcctcacactctcc                        | Dicer     | gttccaagtcggttgatactgg+actctcgggttctgcattagg      |
| PIWIL2         | gtatcagcagagaagtgacaagc+agtcccaagactgaggtgttcc                        |           |                                                   |

**Table 3. Primers used in ChIP and RIP assays**

| Name           | Sequences                                           |
|----------------|-----------------------------------------------------|
| HoxA1-AluSq    | gcataagtgaacaaggacttggg+agagacaaggattcacatgttgg     |
| HoxA3-AluSg    | cactgagctctccagatacccta+ctcccaaagtgtgggattac        |
| HoxA13-AluSp   | cactgtccctaccagcatattaaca+gtagagacagggtttctccatgttg |
| HoxB1-AluSp    | ccctgtctgtcatctggagag+ctcccaaagtgtgggattaca         |
| HoxB1-AluY     | actttctctctccccaacaac+aggaaaggtagcgtgacatga         |
| HoxC4-AluSq    | caaggagcactggtgagagtatg+aagtgtaaaggggtcctgagacc     |
| HoxC13-AluJb   | caacagagcgataccctgtctc+ accccttactgatcacagctctc     |
| HoxD1-3'AluSx2 | ctagaaacctctgctagacctca+ggattacagcatgagccacta       |
| HoxD1-5'AluY   | ctaactggggtgttagggaagaac+ttagtagagacggggtttcacc     |
| NANOGp         | gacctgggaagaagctaagagc+ggcattatagcatgaagccaag       |
| NANOG-3'utr    | agtctggacactggctgaatc+aaagaaacctcgctgattaggc        |
| TDGF1-3'utr    | aacatctttaaggagggaacc+gaaacttgccttcatttagc          |

**Table 4. Probes for Northern blot**

| Name                   | Sequences                                     |
|------------------------|-----------------------------------------------|
| radio-labeled DR2 Alu  | 5'- gagacggagtttactct-3'                      |
| biotin-labeled DR2 Alu | 5'-cggcctcccaaagtgtgggattaca-3'               |
| miR106a                | 5'-gtaagaagtgttacattgcag-3'                   |
| U6                     | 5'-cggtccaatttttagtatatgtgctgccgaagcgagcac-3' |
